# Supplementary material for: Polarization of HIV-1- and CMV-Specific IL-17-Producing T Cells among People with HIV under Antiretroviral Therapy with Cannabis and/or Cocaine Usage
Source: MDPI journal article supplement (doi:10.3390/ph17040465), 2024-04-06
Supplement: s1 [file s1]

Table S1. Statistical Analyses

**Parameter****Table Analyzed**

HIV+  
vs  
HIV+ DU

## Mann Whitney test

P value 0,7374  
Exact or approximate P value? Gaussian Approximation  
P value summary ns  
Are medians signif. different? ( $P < 0.05$ ) No  
One- or two-tailed P value? Two-tailed  
Sum of ranks in column E,F 194 , 472  
Mann-Whitney U 121

**Table Analyzed**

HIV+  
vs  
HIV+ DU

## Mann Whitney test

P value 0,1198  
Exact or approximate P value? Gaussian Approximation  
P value summary ns  
Are medians signif. different? ( $P < 0.05$ ) No  
One- or two-tailed P value? Two-tailed  
Sum of ranks in column E,F 125 , 505  
Mann-Whitney U 80,0

**Table Analyzed**

HIV+  
vs  
HIV+DU

## Mann Whitney test

P value 0,3287  
Exact or approximate P value? Gaussian Approximation  
P value summary ns  
Are medians signif. different? ( $P < 0.05$ ) No  
One- or two-tailed P value? Two-tailed  
Sum of ranks in column E,F 174 , 568  
Mann-Whitney U 119

**Parameter****Table Analyzed**

HIV+  
vs  
HIV+ DU

Mann Whitney test

|                                          |                        |
|------------------------------------------|------------------------|
| P value                                  | 0,9256                 |
| Exact or approximate P value?            | Gaussian Approximation |
| P value summary                          | ns                     |
| Are medians signif. different? (P < 0.05 | No                     |
| One- or two-tailed P value?              | Two-tailed             |
| Sum of ranks in column E,F               | 188 , 478              |
| Mann-Whitney U                           | 127                    |

**Table Analyzed**

HIV+  
vs  
HIV+ DU

Mann Whitney test

|                                          |                        |
|------------------------------------------|------------------------|
| P value                                  | 0,6178                 |
| Exact or approximate P value?            | Gaussian Approximation |
| P value summary                          | ns                     |
| Are medians signif. different? (P < 0.05 | No                     |
| One- or two-tailed P value?              | Two-tailed             |
| Sum of ranks in column E,F               | 154 , 512              |
| Mann-Whitney U                           | 109                    |

**Table Analyzed**

|          |        |
|----------|--------|
| Column E | HIV+   |
| vs       | vs     |
| Column F | HIV+DU |

Mann Whitney test

|                                          |                        |
|------------------------------------------|------------------------|
| P value                                  | 0,2985                 |
| Exact or approximate P value?            | Gaussian Approximation |
| P value summary                          | ns                     |
| Are medians signif. different? (P < 0.05 | No                     |
| One- or two-tailed P value?              | Two-tailed             |
| Sum of ranks in column E,F               | 217 , 486              |
| Mann-Whitney U                           | 108                    |

**Parameter**

**Table Analyzed**

HIV+  
vs  
HIV+ DU

Mann Whitney test  
P value 0,7622  
Exact or approximate P value? Gaussian Approximation  
P value summary ns  
Are medians signif. different? (P < 0.05 No  
One- or two-tailed P value? Two-tailed  
Sum of ranks in column E,F 176 , 490  
Mann-Whitney U 121

**Table Analyzed**

HIV+  
vs  
HIV+DU

Mann Whitney test  
P value 0,0376  
Exact or approximate P value? Gaussian Approximation  
P value summary \*  
Are medians signif. different? (P < 0.05 Yes  
One- or two-tailed P value? Two-tailed  
Sum of ranks in column E,F 116 , 550  
Mann-Whitney U 71,0

**Table Analyzed**

Column E HIV+  
vs vs  
Column F HIV+DU

Mann Whitney test  
P value 0,2985  
Exact or approximate P value? Gaussian Approximation  
P value summary ns  
Are medians signif. different? (P < 0.05 No  
One- or two-tailed P value? Two-tailed  
Sum of ranks in column E,F 217 , 486  
Mann-Whitney U 108

**Parameter**

**Table Analyzed**

HIV+  
vs  
HIV+ DU

|                                          |                        |
|------------------------------------------|------------------------|
| Mann Whitney test                        |                        |
| P value                                  | 0.0542                 |
| Exact or approximate P value?            | Gaussian Approximation |
| P value summary                          | ns                     |
| Are medians signif. different? (P < 0.05 | No                     |
| One- or two-tailed P value?              | Two-tailed             |
| Sum of ranks in column A,B               | 239 , 465              |
| Mann-Whitney U                           | 86.5                   |

|                |         |
|----------------|---------|
| Table Analyzed |         |
|                | HIV+    |
|                | vs      |
|                | HIV+ DU |

|                                          |                        |
|------------------------------------------|------------------------|
| Mann Whitney test                        |                        |
| P value                                  | 0.0275                 |
| Exact or approximate P value?            | Gaussian Approximation |
| P value summary                          | *                      |
| Are medians signif. different? (P < 0.05 | Yes                    |
| One- or two-tailed P value?              | Two-tailed             |
| Sum of ranks in column A,B               | 118 , 443              |
| Mann-Whitney U                           | 63                     |

|                |         |
|----------------|---------|
| Table Analyzed |         |
|                | HIV+    |
|                | vs      |
|                | HIV+ DU |

|                                          |                        |
|------------------------------------------|------------------------|
| Mann Whitney test                        |                        |
| P value                                  | 0,4716                 |
| Exact or approximate P value?            | Gaussian Approximation |
| P value summary                          | ns                     |
| Are medians signif. different? (P < 0.05 | No                     |
| One- or two-tailed P value?              | Two-tailed             |
| Sum of ranks in column A,B               | 169 , 497              |
| Mann-Whitney U                           | 114                    |

|                |         |
|----------------|---------|
| Parameter      |         |
| Table Analyzed |         |
|                | HIV+    |
|                | vs      |
|                | HIV+ DU |

Mann Whitney test

|                                          |                        |     |
|------------------------------------------|------------------------|-----|
| P value                                  | 0,5662                 |     |
| Exact or approximate P value?            | Gaussian Approximation |     |
| P value summary                          | ns                     |     |
| Are medians signif. different? (P < 0.05 | No                     |     |
| One- or two-tailed P value?              | Two-tailed             |     |
| Sum of ranks in column A,B               | 151 , 515              |     |
| Mann-Whitney U                           |                        | 106 |

#### Table Analyzed

HIV+  
vs  
HIV+DU

#### Mann Whitney test

|                                          |                        |
|------------------------------------------|------------------------|
| P value                                  | 0,2220                 |
| Exact or approximate P value?            | Gaussian Approximation |
| P value summary                          | ns                     |
| Are medians signif. different? (P < 0.05 | No                     |
| One- or two-tailed P value?              | Two-tailed             |
| Sum of ranks in column A,B               | 155 , 548              |
| Mann-Whitney U                           | 100                    |

#### Table Analyzed

HIV+  
vs  
HIV+ DU

#### Mann Whitney test

|                                          |                        |
|------------------------------------------|------------------------|
| P value                                  | 0,2669                 |
| Exact or approximate P value?            | Gaussian Approximation |
| P value summary                          | ns                     |
| Are medians signif. different? (P < 0.05 | No                     |
| One- or two-tailed P value?              | Two-tailed             |
| Sum of ranks in column A,B               | 141 , 526              |
| Mann-Whitney U                           | 95,5                   |

#### Parameter

#### Table Analyzed

HIV+  
vs  
HIV+ DU

#### Mann Whitney test

|                               |                        |
|-------------------------------|------------------------|
| P value                       | 0,2054                 |
| Exact or approximate P value? | Gaussian Approximation |

|                                          |            |
|------------------------------------------|------------|
| P value summary                          | ns         |
| Are medians signif. different? (P < 0.05 | No         |
| One- or two-tailed P value?              | Two-tailed |
| Sum of ranks in column A,B               | 153 , 551  |
| Mann-Whitney U                           | 97,5       |

#### Table Analyzed

HIV+  
vs  
HIV+ DU

#### Mann Whitney test

|                                          |                        |
|------------------------------------------|------------------------|
| P value                                  | 0,9800                 |
| Exact or approximate P value?            | Gaussian Approximation |
| P value summary                          | ns                     |
| Are medians signif. different? (P < 0.05 | No                     |
| One- or two-tailed P value?              | Two-tailed             |
| Sum of ranks in column A,B               | 191 , 512              |
| Mann-Whitney U                           | 134                    |

#### Table Analyzed

HIV+  
vs  
HIV+ DU

#### Mann Whitney test

|                                          |                        |
|------------------------------------------|------------------------|
| P value                                  | 0,3223                 |
| Exact or approximate P value?            | Gaussian Approximation |
| P value summary                          | ns                     |
| Are medians signif. different? (P < 0.05 | No                     |
| One- or two-tailed P value?              | Two-tailed             |
| Sum of ranks in column A,B               | 162 , 541              |
| Mann-Whitney U                           | 107                    |

## HIV Stimulation

### CD4 IFN-γ

|         |         |         |
|---------|---------|---------|
| HIV+    | HIV+    | HIV+    |
| vs      | vs      | vs      |
| HIV+Can | HIV+Coc | HIV+Coc |

|                        |                        |                        |
|------------------------|------------------------|------------------------|
| 0.4955                 | 0.5849                 | 0.5849                 |
| Gaussian Approximation | Gaussian Approximation | Gaussian Approximation |
| ns                     | ns                     | ns                     |
| No                     | No                     | No                     |
| Two-tailed             | Two-tailed             | Two-tailed             |
| 108 , 82               | 95.5 , 57.5            | 95.5 , 57.5            |
| 37                     | 29.5                   | 29.5                   |

### CD4 IL-17

|         |         |             |
|---------|---------|-------------|
| HIV+    | HIV+    | HIV+        |
| vs      | vs      | vs          |
| HIV+Can | HIV+Coc | HIV+Can+Coc |

|                        |                        |                        |
|------------------------|------------------------|------------------------|
| 0.5274                 | 0.3677                 | 0.0296                 |
| Gaussian Approximation | Gaussian Approximation | Gaussian Approximation |
| ns                     | ns                     | *                      |
| No                     | No                     | Yes                    |
| Two-tailed             | Two-tailed             | Two-tailed             |
| 83.5 , 107             | 69 , 67                | 62.5 , 109             |
| 38.5                   | 24                     | 17.5                   |

### CD4 IFN-γ/IL-17

|         |         |             |
|---------|---------|-------------|
| HIV+    | HIV+    | HIV+        |
| vs      | vs      | vs          |
| HIV+Can | HIV+Coc | HIV+Can+Coc |

|                        |                        |                        |
|------------------------|------------------------|------------------------|
| 0,9544                 | 0,5552                 | 0,5184                 |
| Gaussian Approximation | Gaussian Approximation | Gaussian Approximation |
| ns                     | ns                     | ns                     |
| No                     | No                     | No                     |
| Two-tailed             | Two-tailed             | Two-tailed             |
| 99 , 91                | 85 , 68                | 98 , 112               |
| 44,0                   | 30,0                   | 43,0                   |

## CMV Stimulation

### CD4 IFN-γ

HIV+  
vs  
HIV+Can

HIV+  
vs  
HIV+Coc

HIV+  
vs  
HIV+Can+Coc

0,9662  
Gaussian Approximation  
ns  
No  
Two-tailed  
100 , 90  
45,0

0,7184  
Gaussian Approximation  
ns  
No  
Two-tailed  
94 , 59  
31,0

0,9684  
Gaussian Approximation  
ns  
No  
Two-tailed  
104 , 106  
49,0

#### CD4 IL-17

HIV+  
vs  
HIV+Can

HIV+  
vs  
HIV+Coc

HIV+  
vs  
HIV+Can+Coc

0,6039  
Gaussian Approximation  
ns  
No  
Two-tailed  
84 , 106  
39,0

0,2938  
Gaussian Approximation  
ns  
No  
Two-tailed  
67 , 69  
22,0

0,8046  
Gaussian Approximation  
ns  
No  
Two-tailed  
93 , 97  
42,0

#### CD4 IFN- $\gamma$ /IL-17

HIV+  
vs  
HIV+Can

HIV+  
vs  
HIV+Coc

HIV+  
vs  
HIV+Can+Coc

0,3935  
Gaussian Approximation  
ns  
No  
Two-tailed  
116 , 94.5  
39,5

0,9179  
Gaussian Approximation  
ns  
No  
Two-tailed  
88.5 , 64.5  
33,5

0,1206  
Gaussian Approximation  
ns  
No  
Two-tailed  
123 , 87  
32,0

#### SEB Stimulation

##### CD4 IFN- $\gamma$

HIV+  
vs  
HIV+Can

HIV+  
vs  
HIV+Coc

HIV+  
vs  
HIV+Can+Coc



0,5950  
Gaussian Approximation  
ns  
No  
Two-tailed  
93 , 97  
38,0

0,4321  
Gaussian Approximation  
ns  
No  
Two-tailed  
98.5 , 54.5  
26,5

0,4480  
Gaussian Approximation  
ns  
No  
Two-tailed  
94.5 , 116  
39,5

#### CD4 IL-17

HIV+  
vs  
HIV+Can

HIV+  
vs  
HIV+Coc

HIV+  
vs  
HIV+Can+Coc

0.0142  
Gaussian Approximation  
\*\*  
Yes  
Two-tailed  
56 , 134  
11,0

0,8540  
Gaussian Approximation  
ns  
No  
Two-tailed  
75 , 61  
30,0

0,1267  
Gaussian Approximation  
ns  
No  
Two-tailed  
75 , 115  
30,0

#### CD4 IFN- $\gamma$ /IL-17

HIV+  
vs  
HIV+Can

HIV+  
vs  
HIV+Coc

HIV+  
vs  
HIV+Can+Coc

0,3935  
Gaussian Approximation  
ns  
No  
Two-tailed  
116 , 94.5  
39,5

0,9179  
Gaussian Approximation  
ns  
No  
Two-tailed  
88.5 , 64.5  
33,5

0,1206  
Gaussian Approximation  
ns  
No  
Two-tailed  
123 , 87  
32,0

### HIV Stimulation

#### CD8 IFN- $\gamma$

HIV+  
vs  
HIV+Can

HIV+  
vs  
HIV+Coc

HIV+  
vs  
HIV+Can+Coc

0.1593  
Gaussian Approximation  
ns  
No  
Two-tailed  
123 , 87.5  
32.5

0.4281  
Gaussian Approximation  
ns  
No  
Two-tailed  
98 , 55  
27

0.0549  
Gaussian Approximation  
ns  
No  
Two-tailed  
128 , 82  
27

#### CD8 IL-17

HIV+  
vs  
HIV+Can

HIV+  
vs  
HIV+Coc

HIV+  
vs  
HIV+Can+Coc

0.3278  
Gaussian Approximation  
ns  
No  
Two-tailed  
94 , 116  
39

0.2036  
Gaussian Approximation  
ns  
No  
Two-tailed  
79 , 74  
24

0.0296  
Gaussian Approximation  
\*  
Yes  
Two-tailed  
79 , 131  
24

#### CD8 IFN- $\gamma$ /IL-17

HIV+  
vs  
HIV+ can

HIV+  
vs  
HIV+ coc

HIV+  
vs  
HIV+Can+Coc

0,8712  
Gaussian Approximation  
ns  
No  
Two-tailed  
103 , 107  
48,0

0,2031  
Gaussian Approximation  
ns  
No  
Two-tailed  
79 , 74  
24,0

0,8712  
Gaussian Approximation  
ns  
No  
Two-tailed  
103 , 107  
48,0

#### CMV Stimulation

##### CD8 IFN- $\gamma$

HIV+  
vs  
HIV+Can

HIV+  
vs  
HIV+Coc

HIV+  
vs  
HIV+Can+Coc

|                        |                        |                        |
|------------------------|------------------------|------------------------|
| 0,7626                 | 0,3280                 | 0,7117                 |
| Gaussian Approximation | Gaussian Approximation | Gaussian Approximation |
| ns                     | ns                     | ns                     |
| No                     | No                     | No                     |
| Two-tailed             | Two-tailed             | Two-tailed             |
| 86 , 104               | 67 , 69                | 81 , 90                |
| 41,0                   | 22,0                   | 36,0                   |

#### CD8 IL-17

|                        |                        |                        |
|------------------------|------------------------|------------------------|
| HIV+                   | HIV+                   | HIV+                   |
| vs                     | vs                     | vs                     |
| HIV+Can                | HIV+Coc                | HIV+Can+Coc            |
| 0,5005                 | 0.0426                 | 0,9012                 |
| Gaussian Approximation | Gaussian Approximation | Gaussian Approximation |
| ns                     | *                      | ns                     |
| No                     | Yes                    | No                     |
| Two-tailed             | Two-tailed             | Two-tailed             |
| 96 , 114               | 66 , 87                | 103 , 107              |
| 41,0                   | 11,0                   | 48,0                   |

#### CD8 IFN- $\gamma$ /IL-17

|                        |                        |                        |
|------------------------|------------------------|------------------------|
| HIV+                   | HIV+                   | HIV+                   |
| vs                     | vs                     | vs                     |
| HIV+Can                | HIV+Coc                | HIV+Can+Coc            |
| 0,2988                 | 0,3032                 | 0,5274                 |
| Gaussian Approximation | Gaussian Approximation | Gaussian Approximation |
| ns                     | ns                     | ns                     |
| No                     | No                     | No                     |
| Two-tailed             | Two-tailed             | Two-tailed             |
| 79 , 111               | 68 , 68                | 83.5 , 107             |
| 34,0                   | 23,0                   | 38,5                   |

#### SEB Stimulation

##### CD8 IFN- $\gamma$

|                        |         |                        |
|------------------------|---------|------------------------|
| HIV+                   | HIV+    | HIV+                   |
| vs                     | vs      | vs                     |
| HIV+Can                | HIV+Coc | HIV+Can+Coc            |
| 0,3256                 | 0,1613  | 0,5199                 |
| Gaussian Approximation | Exact   | Gaussian Approximation |

ns  
No  
Two-tailed  
91.5 , 119  
36,5

ns  
No  
Two-tailed  
75 , 78  
20,0

ns  
No  
Two-tailed  
96 , 114  
41,0

#### CD8 IL-17

HIV+  
vs  
HIV+Can

HIV+  
vs  
HIV+Coc

HIV+  
vs  
HIV+Can+Coc

0,5843  
Gaussian Approximation  
ns  
No  
Two-tailed  
110 , 100  
45,0

0,6463  
Gaussian Approximation  
ns  
No  
Two-tailed  
86 , 67  
31,0

0,9569  
Gaussian Approximation  
ns  
No  
Two-tailed  
105 , 105  
50,0

#### CD8 IFN- $\gamma$ /IL-17

HIV+  
vs  
HIV+Can

HIV+  
vs  
HIV+Coc

HIV+  
vs  
HIV+Can+Coc

0,6863  
Gaussian Approximation  
ns  
No  
Two-tailed  
99.5 , 111  
44,5

0,2062  
Gaussian Approximation  
ns  
No  
Two-tailed  
77 , 76  
22,0

0,4665  
Gaussian Approximation  
ns  
No  
Two-tailed  
95.5 , 115  
40,5

| Parameter                                 | HIV S                  |                        |
|-------------------------------------------|------------------------|------------------------|
| Table Analyzed                            | C                      |                        |
|                                           | HIV+<br>vs<br>HIV+ DU  | HIV+<br>vs<br>HIV+Can  |
| Mann Whitney test                         |                        |                        |
| P value                                   | 0.0542                 | 0.1593                 |
| Exact or approximate P value?             | Gaussian Approximation | Gaussian Approximation |
| P value summary                           | ns                     | ns                     |
| Are medians signif. different? (P < 0.05) | No                     | No                     |
| One- or two-tailed P value?               | Two-tailed             | Two-tailed             |
| Sum of ranks in column A,B                | 239 , 465              | 123 , 87.5             |
| Mann-Whitney U                            | 86.5                   | 32.5                   |

| Table Analyzed                            | C                      |                        |
|-------------------------------------------|------------------------|------------------------|
|                                           | HIV+<br>vs<br>HIV+ DU  | HIV+<br>vs<br>HIV+Can  |
| Mann Whitney test                         |                        |                        |
| P value                                   | 0.0275                 | 0.3278                 |
| Exact or approximate P value?             | Gaussian Approximation | Gaussian Approximation |
| P value summary                           | *                      | ns                     |
| Are medians signif. different? (P < 0.05) | Yes                    | No                     |
| One- or two-tailed P value?               | Two-tailed             | Two-tailed             |
| Sum of ranks in column A,B                | 118 , 443              | 94 , 116               |
| Mann-Whitney U                            | 63                     | 39                     |

| Table Analyzed                            | CD8                    |                        |
|-------------------------------------------|------------------------|------------------------|
|                                           | HIV+<br>vs<br>HIV+ DU  | HIV+<br>vs<br>HIV+ can |
| Mann Whitney test                         |                        |                        |
| P value                                   | 0,4716                 | 0,8712                 |
| Exact or approximate P value?             | Gaussian Approximation | Gaussian Approximation |
| P value summary                           | ns                     | ns                     |
| Are medians signif. different? (P < 0.05) | No                     | No                     |
| One- or two-tailed P value?               | Two-tailed             | Two-tailed             |
| Sum of ranks in column A,B                | 169 , 497              | 103 , 107              |
| Mann-Whitney U                            | 114                    | 48,0                   |

| Parameter      | CMV S                 |                       |
|----------------|-----------------------|-----------------------|
| Table Analyzed | C                     |                       |
|                | HIV+<br>vs<br>HIV+ DU | HIV+<br>vs<br>HIV+Can |

# Mann Whitney test

|                                           |                        |                        |
|-------------------------------------------|------------------------|------------------------|
| P value                                   | 0,5662                 | 0,7626                 |
| Exact or approximate P value?             | Gaussian Approximation | Gaussian Approximation |
| P value summary                           | ns                     | ns                     |
| Are medians signif. different? (P < 0.05) | No                     | No                     |
| One- or two-tailed P value?               | Two-tailed             | Two-tailed             |
| Sum of ranks in column A,B                | 151 , 515              | 86 , 104               |
| Mann-Whitney U                            | 106 41,0               |                        |

## Table Analyzed

|        |         |
|--------|---------|
| HIV+   | HIV+    |
| vs     | vs      |
| HIV+DU | HIV+Can |

# Mann Whitney test

|                                           |                        |                        |
|-------------------------------------------|------------------------|------------------------|
| P value                                   | 0,2220                 | 0,5005                 |
| Exact or approximate P value?             | Gaussian Approximation | Gaussian Approximation |
| P value summary                           | ns                     | ns                     |
| Are medians signif. different? (P < 0.05) | No                     | No                     |
| One- or two-tailed P value?               | Two-tailed             | Two-tailed             |
| Sum of ranks in column A,B                | 155 , 548              | 96 , 114               |
| Mann-Whitney U                            | 100                    | 41,0                   |

## Table Analyzed

|         |         |
|---------|---------|
| HIV+    | HIV+    |
| vs      | vs      |
| HIV+ DU | HIV+Can |

# Mann Whitney test

|                                           |                        |                        |
|-------------------------------------------|------------------------|------------------------|
| P value                                   | 0,2669                 | 0,2988                 |
| Exact or approximate P value?             | Gaussian Approximation | Gaussian Approximation |
| P value summary                           | ns                     | ns                     |
| Are medians signif. different? (P < 0.05) | No                     | No                     |
| One- or two-tailed P value?               | Two-tailed             | Two-tailed             |
| Sum of ranks in column A,B                | 141 , 526              | 79 , 111               |
| Mann-Whitney U                            | 95,5                   | 34,0                   |

## Parameter

SEB S

## Table Analyzed

|         |         |
|---------|---------|
| HIV+    | HIV+    |
| vs      | vs      |
| HIV+ DU | HIV+Can |

# Mann Whitney test

|                               |                        |                        |
|-------------------------------|------------------------|------------------------|
| P value                       | 0,2054                 | 0,3256                 |
| Exact or approximate P value? | Gaussian Approximation | Gaussian Approximation |
| P value summary               | ns                     | ns                     |

|                                               |            |            |
|-----------------------------------------------|------------|------------|
| Are medians signif. different? ( $P < 0.05$ ) | No         | No         |
| One- or two-tailed P value?                   | Two-tailed | Two-tailed |
| Sum of ranks in column A,B                    | 153 , 551  | 91.5 , 119 |
| Mann-Whitney U                                | 97,5       | 36,5       |

|                |         |         |
|----------------|---------|---------|
| Table Analyzed |         |         |
|                | HIV+    | HIV+    |
|                | vs      | vs      |
|                | HIV+ DU | HIV+Can |

|                                               |                        |                        |
|-----------------------------------------------|------------------------|------------------------|
| Mann Whitney test                             |                        |                        |
| P value                                       | 0,9800                 | 0,5843                 |
| Exact or approximate P value?                 | Gaussian Approximation | Gaussian Approximation |
| P value summary                               | ns                     | ns                     |
| Are medians signif. different? ( $P < 0.05$ ) | No                     | No                     |
| One- or two-tailed P value?                   | Two-tailed             | Two-tailed             |
| Sum of ranks in column A,B                    | 191 , 512              | 110 , 100              |
| Mann-Whitney U                                | 134                    | 45,0                   |

|                |         |         |
|----------------|---------|---------|
| Table Analyzed |         |         |
|                | HIV+    | HIV+    |
|                | vs      | vs      |
|                | HIV+ DU | HIV+Can |

|                                               |                        |                        |
|-----------------------------------------------|------------------------|------------------------|
| Mann Whitney test                             |                        |                        |
| P value                                       | 0,3223                 | 0,6863                 |
| Exact or approximate P value?                 | Gaussian Approximation | Gaussian Approximation |
| P value summary                               | ns                     | ns                     |
| Are medians signif. different? ( $P < 0.05$ ) | No                     | No                     |
| One- or two-tailed P value?                   | Two-tailed             | Two-tailed             |
| Sum of ranks in column A,B                    | 162 , 541              | 99.5 , 111             |
| Mann-Whitney U                                | 107                    | 44,5                   |

## stimulation

| CD8 IFN-γ              |                        |
|------------------------|------------------------|
| HIV+                   | HIV+                   |
| vs                     | vs                     |
| HIV+Coc                | HIV+Can+Coc            |
| 0.4281                 | 0.0549                 |
| Gaussian Approximation | Gaussian Approximation |
| ns                     | ns                     |
| No                     | No                     |
| Two-tailed             | Two-tailed             |
| 98 , 55                | 128 , 82               |
| 27                     | 27                     |

| CD8 IL-17              |                        |
|------------------------|------------------------|
| HIV+                   | HIV+                   |
| vs                     | vs                     |
| HIV+Coc                | HIV+Can+Coc            |
| 0.2036                 | 0.0296                 |
| Gaussian Approximation | Gaussian Approximation |
| ns                     | *                      |
| No                     | Yes                    |
| Two-tailed             | Two-tailed             |
| 79 , 74                | 79 , 131               |
| 24                     | 24                     |

| CD8 IFN-γ/IL-17        |                        |
|------------------------|------------------------|
| HIV+                   | HIV+                   |
| vs                     | vs                     |
| HIV+ coc               | HIV+Can+Coc            |
| 0,2031                 | 0,8712                 |
| Gaussian Approximation | Gaussian Approximation |
| ns                     | ns                     |
| No                     | No                     |
| Two-tailed             | Two-tailed             |
| 79 , 74                | 103 , 107              |
| 24,0                   | 48,0                   |

## Stimulation

| CD8 IFN-γ |             |
|-----------|-------------|
| HIV+      | HIV+        |
| vs        | vs          |
| HIV+Coc   | HIV+Can+Coc |



|                        |                        |
|------------------------|------------------------|
| 0,3280                 | 0,7117                 |
| Gaussian Approximation | Gaussian Approximation |
| ns                     | ns                     |
| No                     | No                     |
| Two-tailed             | Two-tailed             |
| 67 , 69                | 81 , 90                |
| 22,0                   | 36,0                   |

#### CD8 IL-17

|                        |                        |
|------------------------|------------------------|
| HIV+                   | HIV+                   |
| vs                     | vs                     |
| HIV+Coc                | HIV+Can+Coc            |
| 0.0426                 | 0,9012                 |
| Gaussian Approximation | Gaussian Approximation |
| *                      | ns                     |
| Yes                    | No                     |
| Two-tailed             | Two-tailed             |
| 66 , 87                | 103 , 107              |
| 11,0                   | 48,0                   |

#### IFN-γ/IL-17

|                        |                        |
|------------------------|------------------------|
| HIV+                   | HIV+                   |
| vs                     | vs                     |
| HIV+Coc                | HIV+Can+Coc            |
| 0,3032                 | 0,5274                 |
| Gaussian Approximation | Gaussian Approximation |
| ns                     | ns                     |
| No                     | No                     |
| Two-tailed             | Two-tailed             |
| 68 , 68                | 83.5 , 107             |
| 23,0                   | 38,5                   |

#### stimulation

#### CD8 IFN-γ

|         |                        |
|---------|------------------------|
| HIV+    | HIV+                   |
| vs      | vs                     |
| HIV+Coc | HIV+Can+Coc            |
| 0,1613  | 0,5199                 |
| Exact   | Gaussian Approximation |
| ns      | ns                     |

No  
Two-tailed  
75 , 78  
20,0

No  
Two-tailed  
96 , 114  
41,0

#### CD8 IL-17

HIV+  
vs  
HIV+Coc

HIV+  
vs  
HIV+Can+Coc

0,6463  
Gaussian Approximation  
ns  
No  
Two-tailed  
86 , 67  
31,0

0,9569  
Gaussian Approximation  
ns  
No  
Two-tailed  
105 , 105  
50,0

#### IFN-γ/IL-17

HIV+  
vs  
HIV+Coc

HIV+  
vs  
HIV+Can+Coc

0,2062  
Gaussian Approximation  
ns  
No  
Two-tailed  
77 , 76  
22,0

0,4665  
Gaussian Approximation  
ns  
No  
Two-tailed  
95.5 , 115  
40,5
